# Supplementary material for: Efficient preclinical treatment of cortical T cell acute lymphoblastic leukemia with T lymphocytes secreting anti-CD1a T cell engagers
Source: PubMed Central journal article supplement — J Immunother Cancer. 2022 Dec 23;10(12):e005333. doi: 10.1136/jitc-2022-005333 (PMC9791403; doi:10.1136/jitc-2022-005333), 2022-12-23
Supplement: jitc-2022-005333supp001.pdf [file jitc-2022-005333supp001.pdf]

**Supplementary Table 1. Flow cytometry antibodies**

| Target                                             | Fluorophore  | Clone        | Isotype        | Source                  | Identifier  |
|----------------------------------------------------|--------------|--------------|----------------|-------------------------|-------------|
| 7-AAD                                              | –            | –            | –              | BD Biosciences          | 559925      |
| Annexin V                                          | PE           | –            | –              | BD Biosciences          | 556421      |
| Cell Proliferation Dye eFluor™ 670                 | –            | –            | –              | ThermoFisher Scientific | 65-0840-85  |
| Streptavidin                                       | PE           | –            | –              | ThermoFisher Scientific | 12-4317-87  |
| Biotin-SP goat anti-mouse IgG, F(ab') <sub>2</sub> | –            | Polyclonal   | –              | Jackson ImmunoResearch  | 115-065-072 |
| CD1a                                               | BV421        | HI149        | Mouse IgG1, κ  | BD Biosciences          | 563938      |
| CD1a                                               | APC          | HI149        | Mouse IgG1, κ  | BD Biosciences          | 559775      |
| CD2                                                | PE           | S5.2         | Mouse IgG2a    | BD Biosciences          | 347405      |
| CD3                                                | V450         | UCHT1        | Mouse IgG1, κ  | BD Biosciences          | 560365      |
| CD3                                                | FITC         | UCHT1        | Mouse IgG1, κ  | BD Biosciences          | 555332      |
| CD3                                                | PerCP        | SK7          | Mouse IgG1, κ  | BD Biosciences          | 345766      |
| CD3                                                | PE-Cy7       | UCHT1        | Mouse IgG1, κ  | BD Biosciences          | 563423      |
| CD3                                                | APC          | UCHT1        | Mouse IgG1, κ  | BD Biosciences          | 555335      |
| CD4                                                | PE           | SK3          | Mouse IgG1, κ  | BD Biosciences          | 555347      |
| CD4                                                | PerCP-Cy5.5  | SK3          | Mouse IgG1, κ  | BD Biosciences          | 332772      |
| CD7                                                | FITC         | M-T701       | Mouse IgG1, κ  | BD Biosciences          | 555360      |
| CD8                                                | BV510        | SK1          | Mouse IgG1, κ  | BioLegend               | 563919      |
| CD8                                                | APC-Cy7      | SK1          | Mouse IgG1, κ  | BioLegend               | 344714      |
| CD25                                               | APC          | M-A251       | Mouse IgG1, κ  | BD Biosciences          | 555434      |
| CD34                                               | APC          | 581          | Mouse IgG1, κ  | BD Biosciences          | 555824      |
| CD38                                               | APC          | HIT2         | Mouse IgG1, κ  | BD Biosciences          | 555462      |
| CD45                                               | APC-H7       | 2D1          | Mouse IgG1, κ  | BD Biosciences          | 560178      |
| CD45 RA                                            | V500         | HI100        | Mouse IgG2b, κ | BD Biosciences          | 561640      |
| CD69                                               | PE           | L78          | Mouse IgG1, κ  | BD Biosciences          | 341652      |
| CD197 (CCR7)                                       | BV421        | 150503       | Mouse IgG2a    | BD Biosciences          | 562555      |
| Fas                                                | APC          | DX2          | Mouse IgG1     | BD Biosciences          | 558814      |
| His                                                | Unconjugated | Penta-His    | Mouse IgG1     | QIAGEN                  | 34660       |
| His                                                | APC          | GG11-8F3.5.1 | Mouse IgG1     | Miltenyi Biotec         | 130-119-782 |
| HLA-ABC                                            | BV510        | G45-2.6      | Mouse IgG1, κ  | BD Biosciences          | 740172      |
| TCR alpha/beta                                     | PE-Cy7       | IP26         | Mouse IgG1, κ  | ThermoFisher Scientific | 25-9986-42  |

### Supplementary Figure Legends

**Supplementary Figure 1.** Functionality of secreted CD1a-TCE. **(A)** Western blot detection of secreted CD1a-TCE in the conditioned media from transfected HEK293T<sup>WT</sup> cells. Conditioned media from non-transfected cells (NT) and blinatumomab (Blina) were used as negative and positive controls, respectively. One representative experiment is shown. **(B)** Binding assays of conditioned media from NT- or CD1a-TCE-transfected HEK293T<sup>WT</sup> cells to K562 cells, primary peripheral blood lymphocytes and MOLT4 cells. Specific binding was detected using anti-His-tag mAb and analyzed by flow cytometry. **(C)** T cell activation assay. Freshly isolated T lymphocytes and CD1a-negative (K562) or CD1a-positive (MOLT4) cells were co-cultured at a 1:1 E:T ratio for 24 hours in the presence of conditioned media from NT, CD1a-CAR- and CD1a-TCE-transfected HEK293T<sup>WT</sup> cells, and CD69 expression was analyzed by flow cytometry. The inset numbers in **B** and **C** represent the percentage of cells staining positive for the indicated marker.

**Supplementary Figure 2.** Cells surface expression profiles of CD3 and CD1a from all cell types used in this study. The numbers represent the percentage of cells staining positive for the indicated marker.

**Supplementary Figure 3.** Comparative in vitro study of engineered CD1a-STAb and CD1a-CAR T cells (cont.). **(A)** CD1a expression on HEK293T<sup>WT</sup> and HEK293T<sup>CD1a</sup> cells. **(B)** Cell viability kinetics over time of both cell lines cultured alone. **(C)** Real-time cell cytotoxicity kinetics of HEK293T<sup>WT</sup> cells co-cultured with activated NT, CD1a-CAR or CD1a-STAb T cells at different E:T ratios (5:1 and 1:1). Cell index values were determined over 80 hours with measurements taken at 15 min intervals after addition of effector cells to target cells. Results from duplicates are shown. **(D)** Cytokine secretion assays from NT, CD1a-CAR or CD1a-STAb T cells co-cultured 24 hours with NALM6, MOLT4 or coT-ALL patient primary cells in a 1:1 E:T ratio. Statistical significance was calculated by a two-way ANOVA test corrected with a Tukey's multiple comparisons test. **(E,F)** Direct contact **(E)** and non-contacting **(F)** bystander T cell cytotoxicity. **(E)** Decreasing numbers of activated effector T (AT) cells (NT, CD1a-CAR or CD1a-STAb) were co-cultured with  $5 \times 10^4$  K562<sup>Luc</sup> target cells and increasing numbers of NT T cells from the same donor (bystander T cells), resulting in the indicated AT:T ratios but maintaining a constant 2:1 Effector (AT+bystander):Target ratio. **(F)**.  $5 \times 10^4$  K562<sup>Luc</sup> cells and  $1 \times 10^5$  bystander T cells were plated in the bottom well and decreasing numbers of AT cells (NT, CD1a-CAR or CD1a-STAb) in the upper well; ND, not determined. After 48 hours, the percentage of specific cytotoxicity was calculated by adding D-luciferin to detect bioluminescence **(E,F)**. **(G)** Representative experiment of coT-ALL leukemia escape from immune pressure after 4 days. MOLT4 cells were co-cultured with NT, CD1a-CAR or CD1a-STAb T cells at the indicated E:T ratios, and the expression of CD3 and CD1a was analyzed by flow cytometry. Inset numbers represent the percentage of cells staining positive for the indicated marker. **(H)** Percentage of CD1a-CAR T cells, CD1a-STAb T cells and non-transduced T cells (Non-CAR T and Non-STAb T) within CD1a<sup>-</sup>CD3<sup>+</sup> cells from immune escape assays after 4, 7 and 11 days of co-culture with MOLT4 cells at the indicated E:T ratios.

**Supplementary Figure 4.** MOLT4 cells express functional Fas receptor (CD95) in the membrane. **(A)** Representative FACS analysis showing cell surface expression of Fas receptor in MOLT4 cells. The inset number represents the percentage of cells staining positive. **(B)** MOLT4 cytotoxicity after 24-hour incubation with the activating anti-Fas clone CH11 with or without the neutralizing anti-Fas clone ZB4. Statistical significance was calculated by a one-way ANOVA test corrected with a Tukey's multiple comparisons test.
