# Supplementary figures and images for: Efficient preclinical treatment of cortical T cell acute lymphoblastic leukemia with T lymphocytes secreting anti-CD1a T cell engagers
Source: PubMed Central journal article supplement — J Immunother Cancer. 2022 Dec 23;10(12):e005333. doi: 10.1136/jitc-2022-005333 (PMC9791403; doi:10.1136/jitc-2022-005333), 2022-12-23

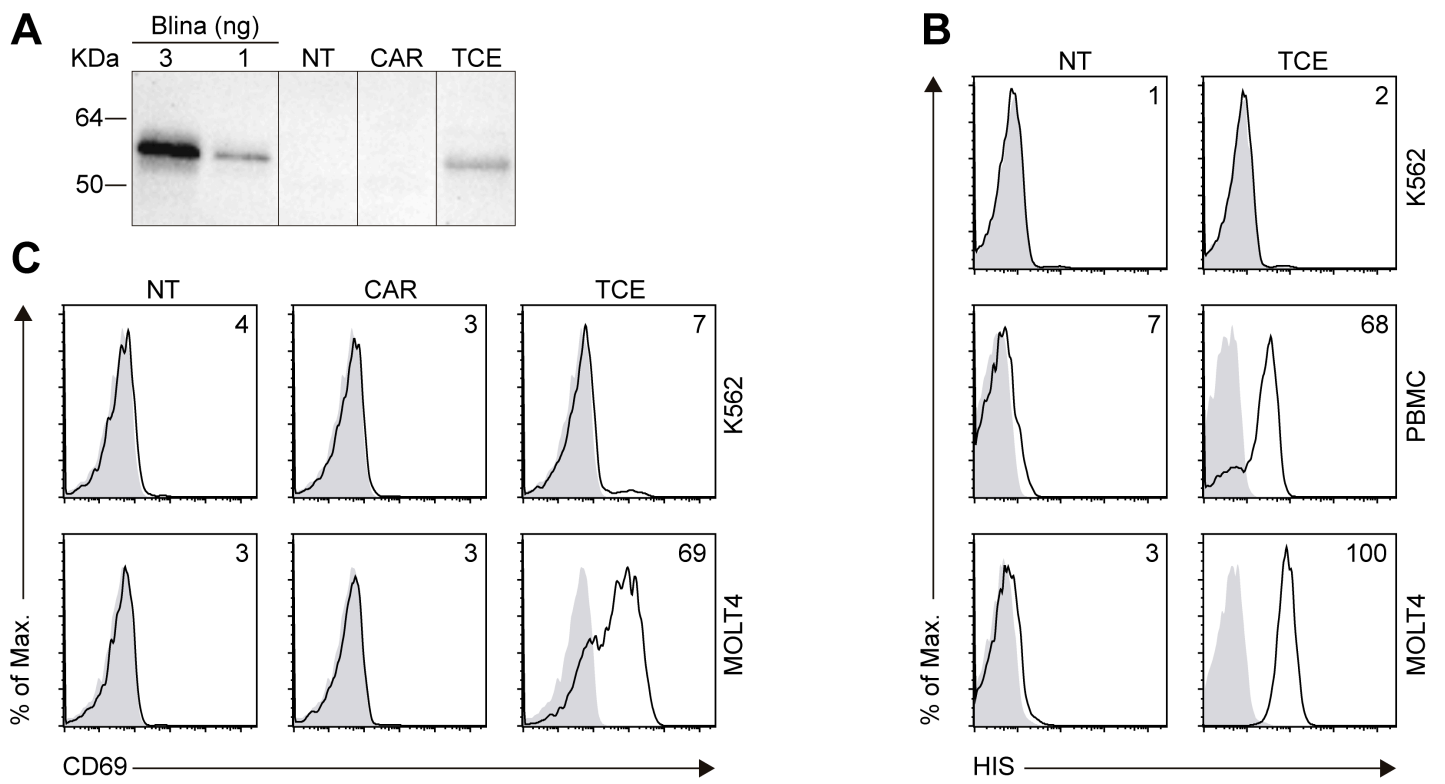

Supplement: jitc-2022-005333supp002.pdf [file jitc-2022-005333supp002.pdf]

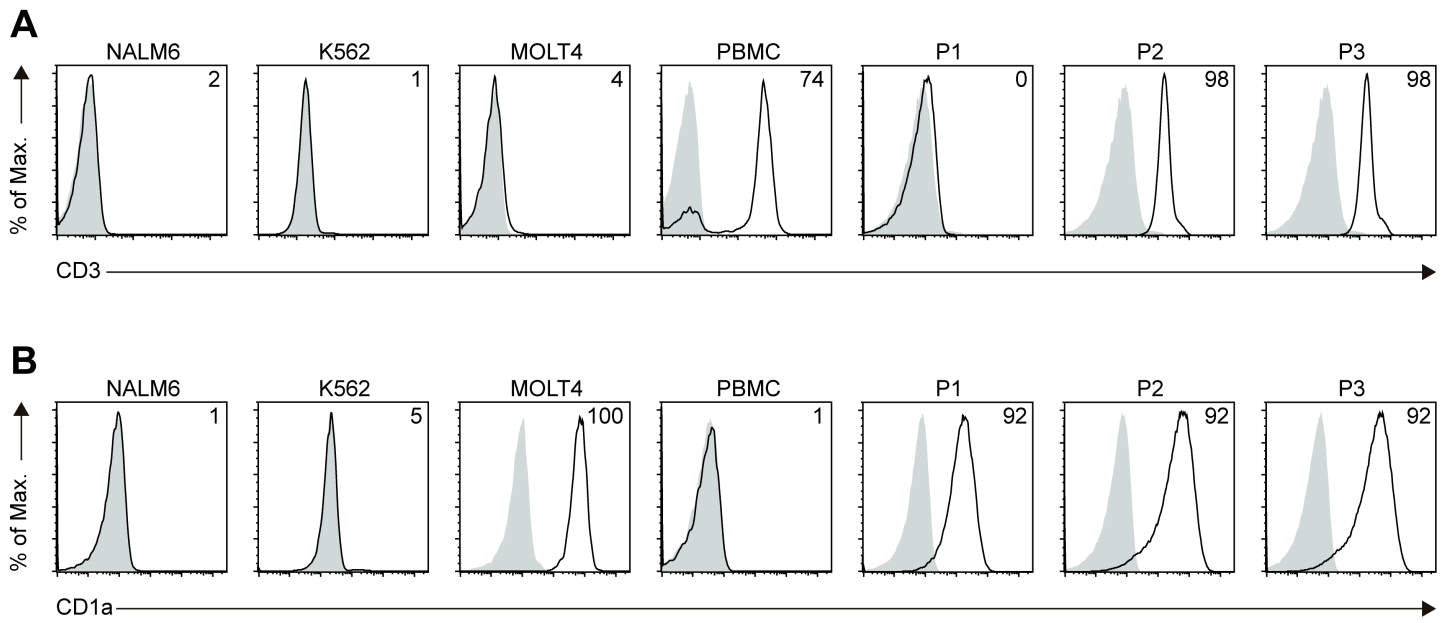

Supplement: jitc-2022-005333supp003.pdf [file jitc-2022-005333supp003.pdf]

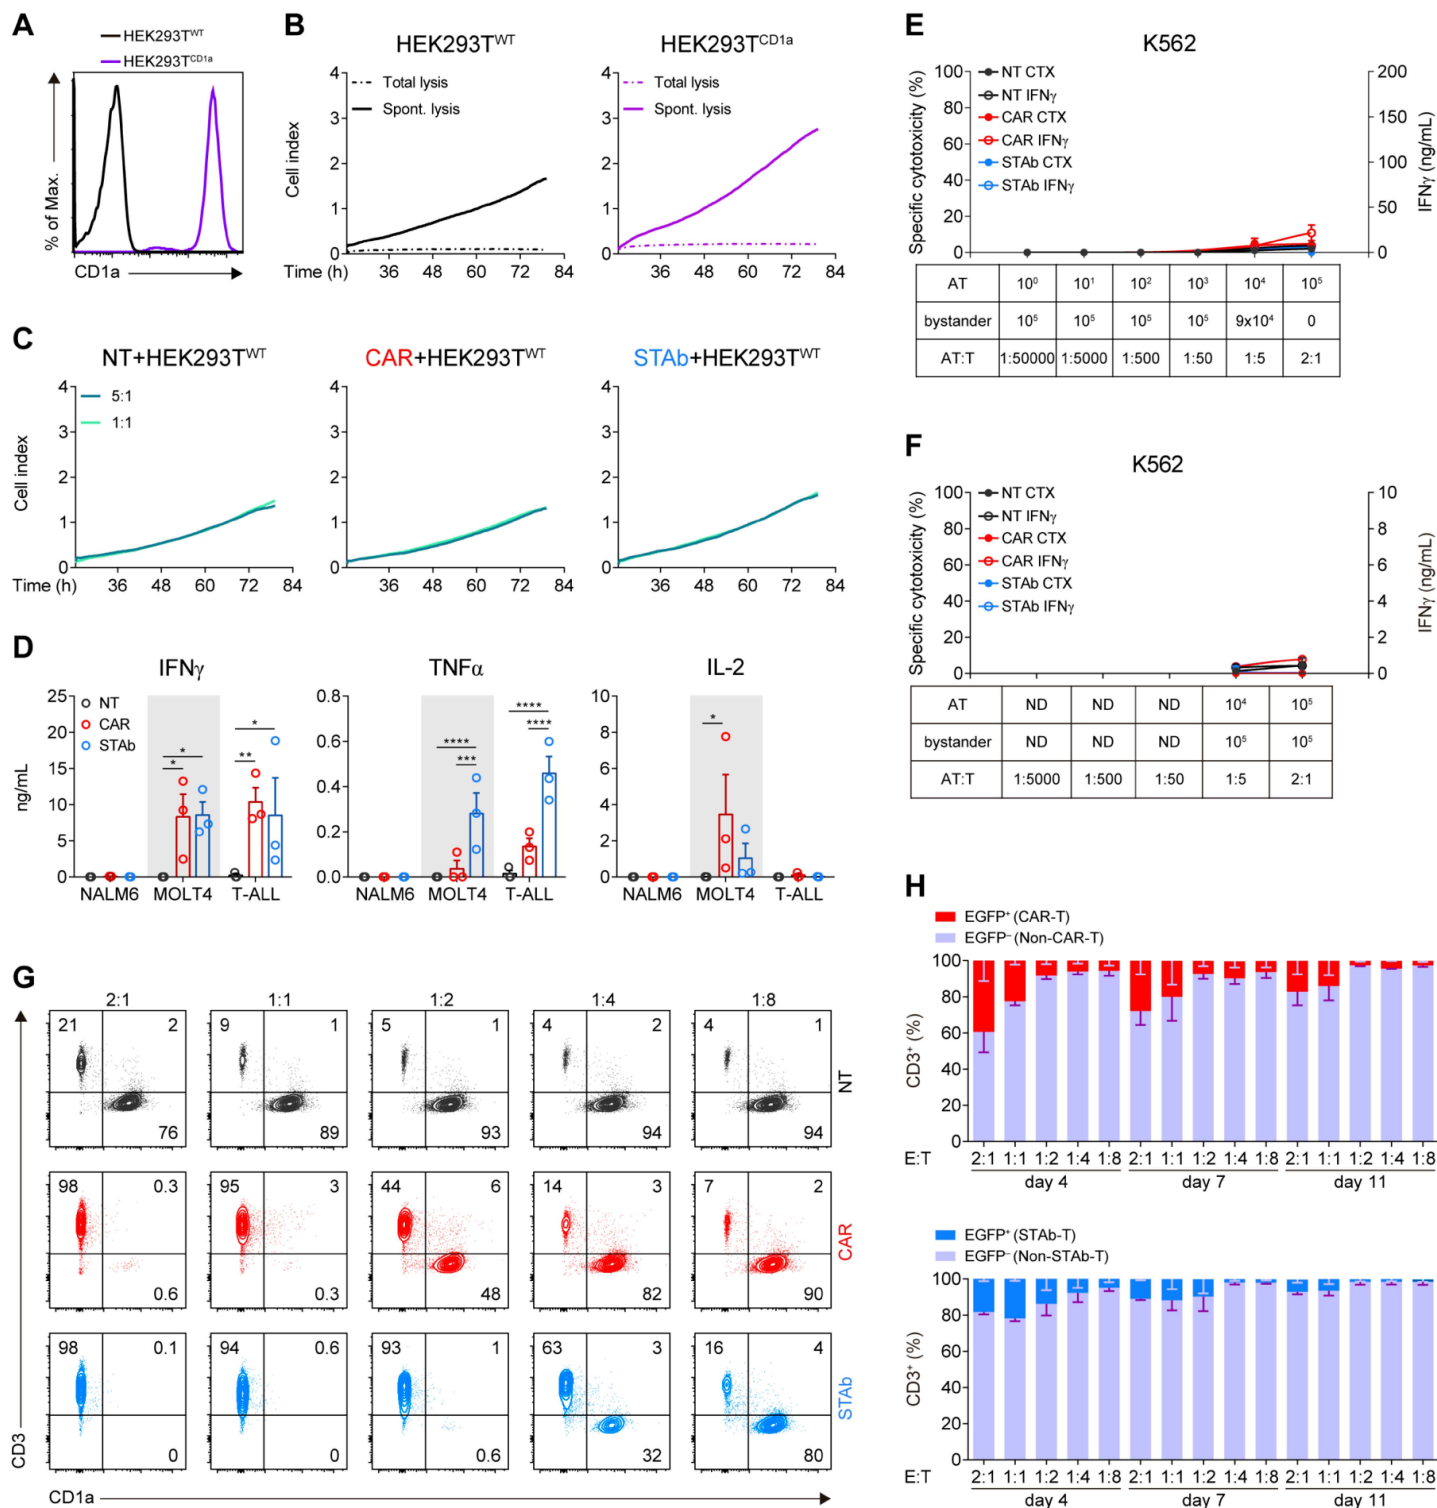

Supplement: jitc-2022-005333supp004.pdf [file jitc-2022-005333supp004.pdf]
