# Supplementary figures and images for: Efficient preclinical treatment of cortical T cell acute lymphoblastic leukemia with T lymphocytes secreting anti-CD1a T cell engagers
Source: HighWire-hosted journal article supplement (doi:10.1136/jitc-2022-005333), 2022-12-01

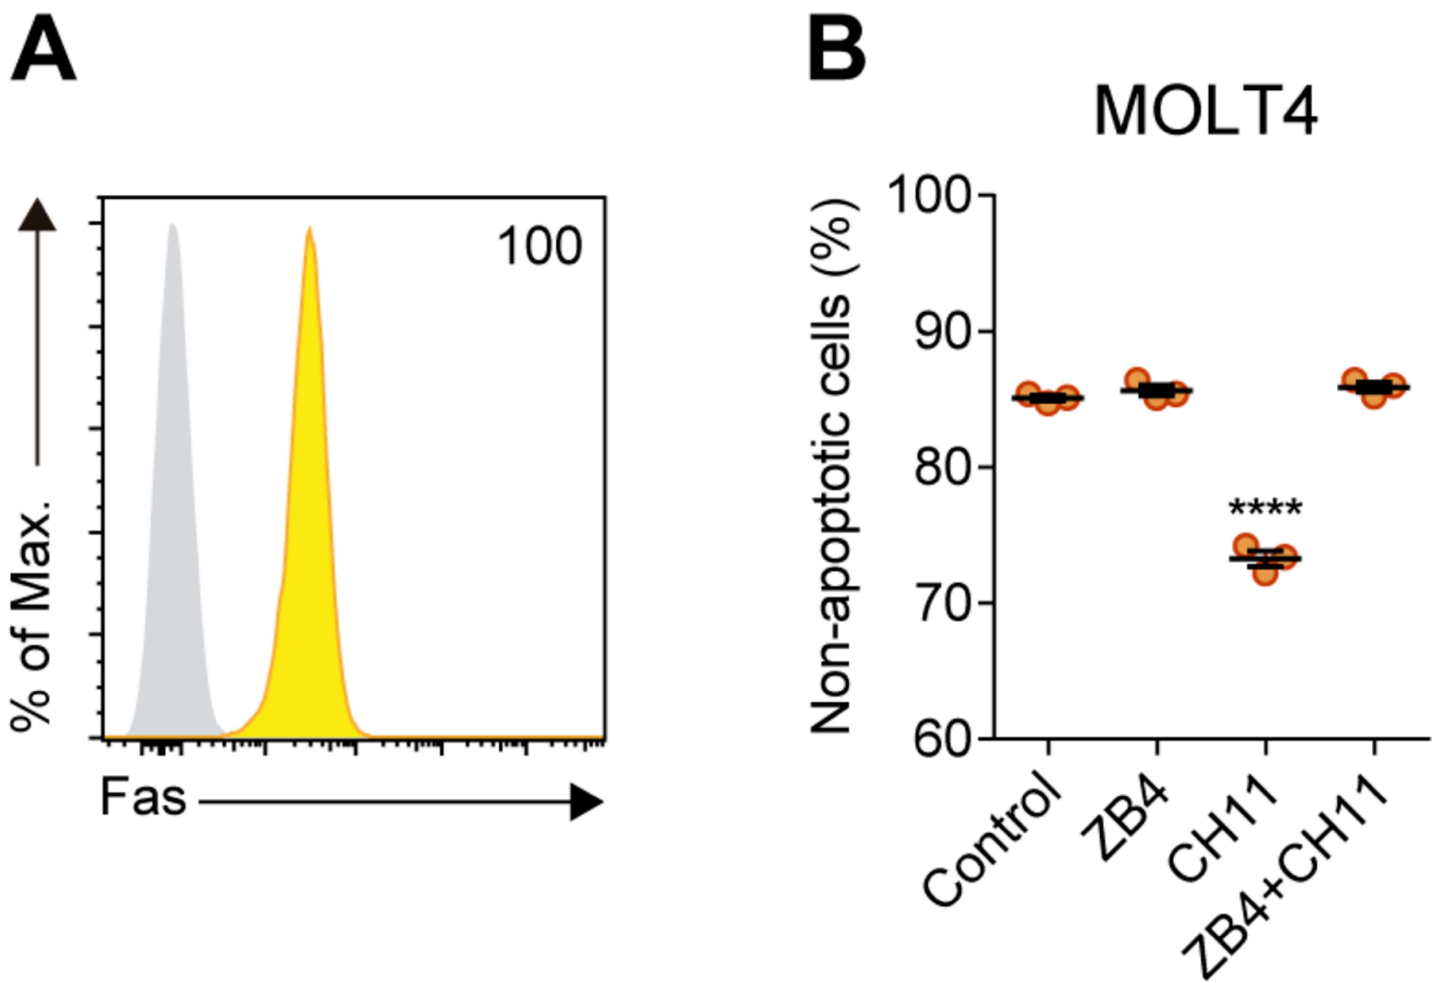

Supplement: jitc-2022-005333supp005_data_supplement.pdf [file jitc-2022-005333supp005_data_supplement.pdf]
